# Supplementary material for: Effectiveness of Simulation Modality on Neonatal Intubation: A Systematic Review and Meta-Analysis
Source: Research Square preprint supplement (doi:10.21203/rs.3.rs-7214212/v1), 2025-08-04
Supplement: Supplementary file 1 [file 88dbeadc2d7544370b079fa8.docx]

**Supplementary Material 1.**

Search Strategy for Systematic Review and Meta-Analysis on Simulation-Based Training in Neonatal Intubation

A comprehensive literature search was conducted in the following databases from inception to 6 June 2025:

- PubMed
- EMBASE
- Cochrane Central Register of Controlled Trials (CENTRAL)

The search strategy combined controlled vocabulary (e.g., MeSH terms) and relevant keywords. Boolean operators (AND, OR) were used to combine terms. No filters or language restrictions were applied at the search stage.

**Search Terms Used:**

Population:
neonatal OR newborn OR neonate

Intervention:
simulation OR "simulation-based training" OR "high-fidelity simulation" OR "low-fidelity simulation" OR "manikin-based training"

Procedure:
intubation OR "endotracheal intubation" OR "airway management"

Outcomes:
effectiveness OR outcome OR "success rate" OR "first-pass success" OR "time to intubation" OR "number of attempts"

**Combined Search String:**

*(neonatal OR newborn OR neonate) AND
(intubation OR airway management OR endotracheal intubation) AND
(simulation OR "simulation-based training" OR "high-fidelity simulation" OR "low-fidelity simulation" OR "manikin-based training") AND
(effectiveness OR outcome OR "success rate" OR "first-pass success" OR "time to intubation" OR "number of attempts"*
